# Supplementary material for: Hibiscus Acid from Hibiscus sabdariffa L. Inhibits Flagellar Motility and Cell Invasion in Salmonella enterica
Source: MDPI journal article supplement (doi:10.3390/molecules27030655), 2022-01-20
Supplement: s1 [file s1]

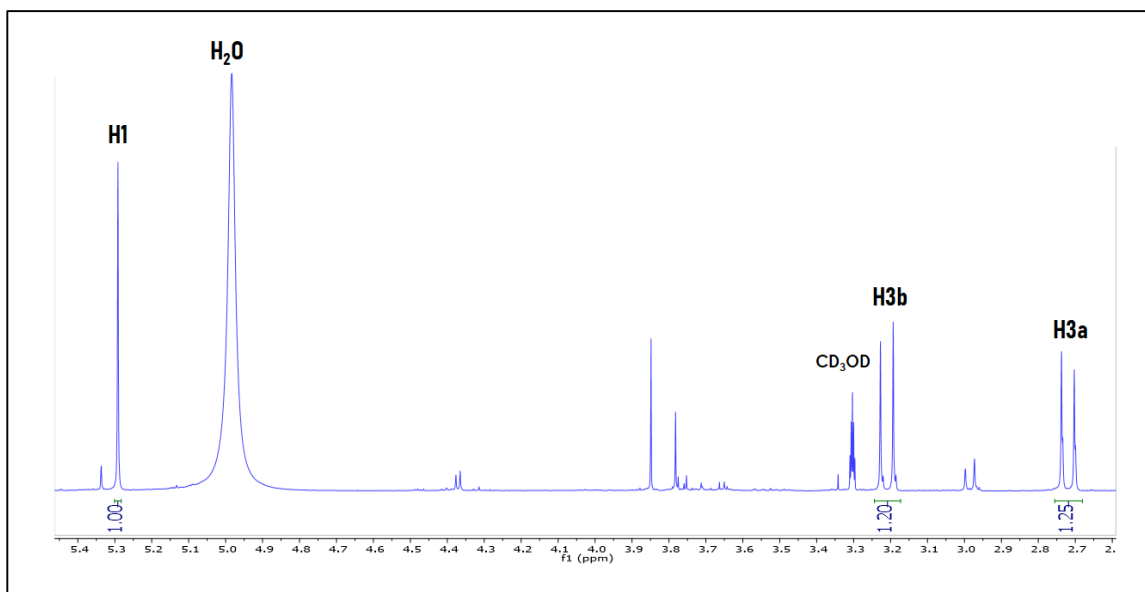

(a)

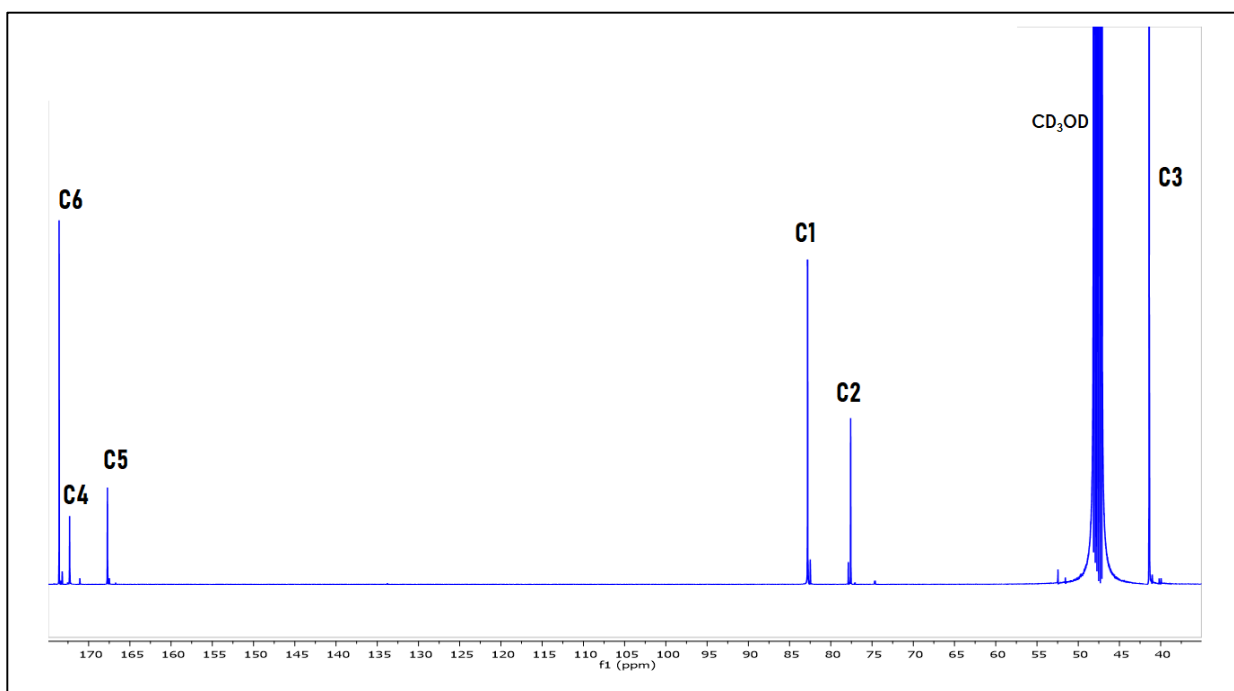

(b)

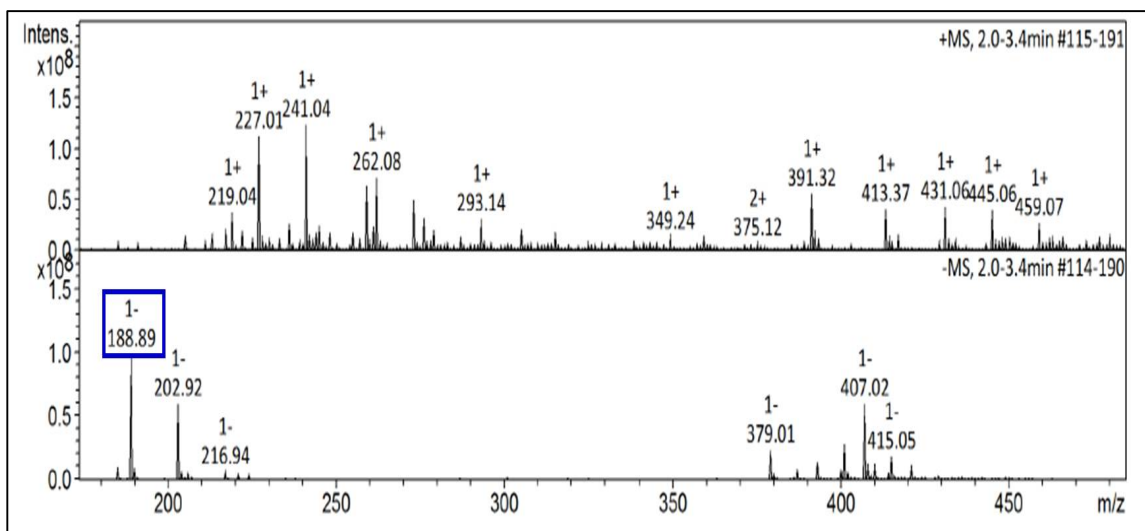

(c)

**Supplementary Figure S1. NMR and mass spectrum data for purified hibiscus acid.** (a) <sup>1</sup>H NMR spectrum (600 MHz, CD<sub>3</sub>OD) of a sample of hibiscus acid. (b) <sup>13</sup>C NMR (150 MHz, CD<sub>3</sub>OD) spectrum of hibiscus acid. (c) Positive (up) and negative (down) mass spectrum (ESI) of hibiscus acid.

Supplementary Figure 2

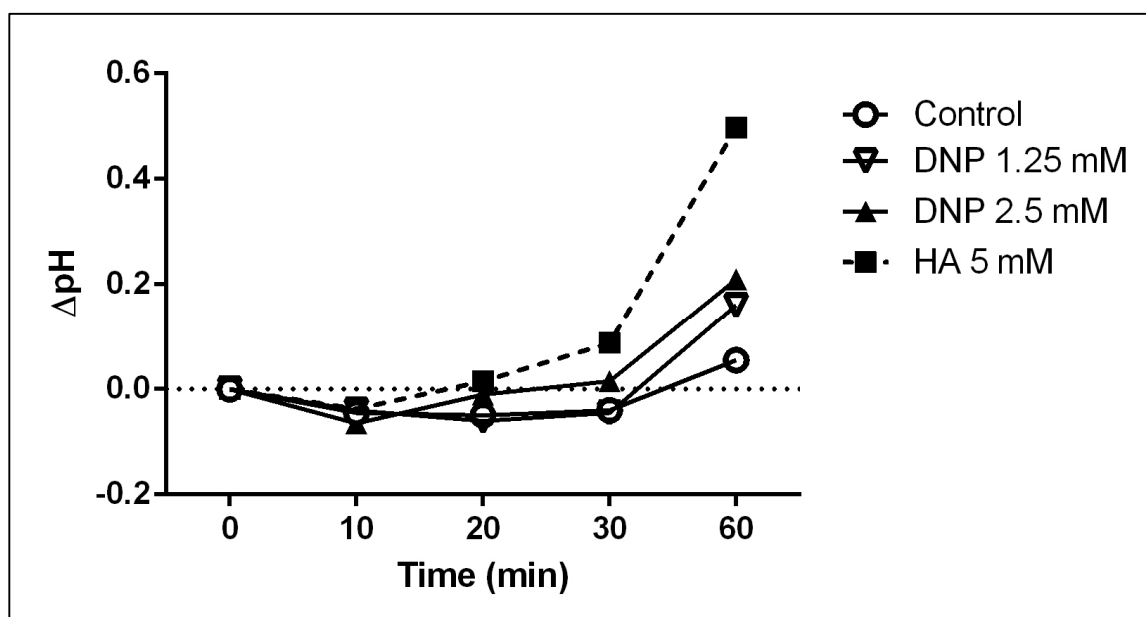

**Supplementary Figure S2. Effect of HA and DNP on extracellular pH in *Salmonella* cultures.** Represented is the difference in pH ( $\Delta$ pH) between the starting point when the compounds were added (0 min) and the indicated time point for each case. Cultures were incubated at 25 °C in agitation (120 rpm) and pH was determined every 10 min as described in the Methods section. Results are the average of two independent experiments made in duplicates. 4% DMSO was used as a control.

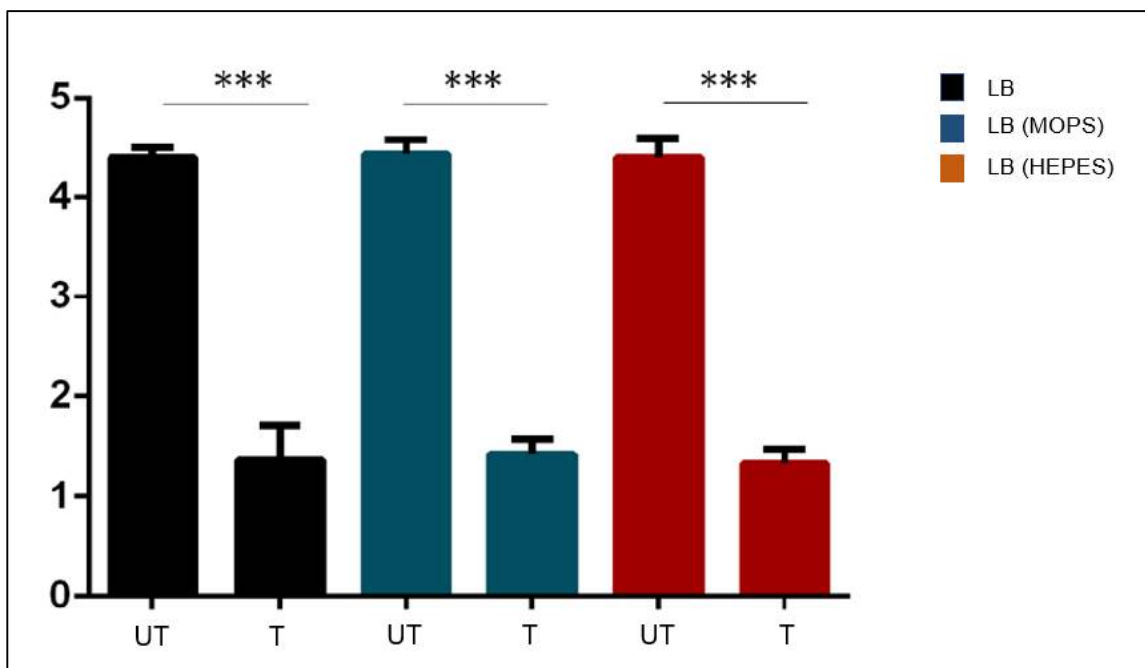

**Supplementary Figure S3. *Salmonella* motility in buffered media.** Bars represent bacterial mobility in semisolid LB media (black bars) or with MOPS (green bars) and HEPES (red bars) pH buffers. Motility of *Salmonella* decreases in the media treated (T) with 0.5 mg/mL of *Hibiscus sabdariffa* L. extract compared with untreated media (UT). The trial was conducted in triplicate and the bar represents the standard deviation.  $P > 0.05$  was considered as a significant difference.

**Supplementary Table S1.** Composition of the mobile phase used for the fractionation of the total extract of *H. sabdariffa* L. by column chromatography and biological activity.

| Mobile phase               | Vol. (mL) | Fractions              | Inhibition of <i>Salmonella</i> motility |
|----------------------------|-----------|------------------------|------------------------------------------|
| Hexane                     | 200       | 1-4                    | Negative                                 |
| Hexane-ethyl acetate 9:1   | 100       |                        |                                          |
| Hexane-ethyl acetate 8:2   | 100       |                        |                                          |
| Hexane-ethyl acetate 7:3   | 100       | 5-6                    | Negative                                 |
| Hexane-ethyl acetate 6:4   | 100       |                        |                                          |
| Hexane-ethyl acetate 5:5   | 100       |                        |                                          |
| Hexane-ethyl acetate 3:7   | 100       | 7-10<br>("Fraction A") | Positive                                 |
| Hexane-ethyl acetate 1:9   | 100       |                        |                                          |
| Ethyl acetate-methanol 9:1 | 100       |                        |                                          |
| Ethyl acetate-methanol 8:2 | 100       |                        |                                          |
| Ethyl acetate-methanol 7:3 | 100       | 11-14                  | Negative                                 |
| Ethyl acetate-methanol 6:4 | 100       |                        |                                          |
| Ethyl acetate-methanol 5:5 | 100       |                        |                                          |
| Ethyl acetate-methanol 3:7 | 100       |                        |                                          |
| Methanol                   | 500       |                        | ND*                                      |

\*. Not determined

**Supplementary Table S2.** Composition of the mobile phase used for the fractionation of the "Fraction A" by column chromatography and biological activity.

| Mobile phase               | Vol. (mL) | Fractions               | Inhibition of <i>Salmonella</i> motility |
|----------------------------|-----------|-------------------------|------------------------------------------|
| Hexane                     | 100       | 1-8                     | Negative                                 |
| Hexane-ethyl acetate 9:1   | 100       |                         |                                          |
| Hexane-ethyl acetate 8:2   | 200       |                         |                                          |
| Hexane-ethyl acetate 7:3   | 100       | 9-13                    | Negative                                 |
| Hexane-ethyl acetate 6:4   | 100       |                         |                                          |
| Hexane-ethyl acetate 5:5   | 100       |                         |                                          |
| Hexane-ethyl acetate 3:7   | 100       | 14-17<br>("Fraction B") | Positive                                 |
| Hexane-ethyl acetate 1:9   | 100       |                         |                                          |
| Ethyl acetate-methanol 9:1 | 200       | 18-46                   | Negative                                 |
| Ethyl acetate-methanol 8:2 | 200       |                         |                                          |
| Ethyl acetate-methanol 7:3 | 100       | 47-54                   | Negative                                 |
| Ethyl acetate-methanol 6:4 | 100       |                         |                                          |
| Ethyl acetate-methanol 5:5 | 100       | 55-69                   | Negative                                 |
| Ethyl acetate-methanol 3:7 | 100       |                         |                                          |
| Methanol                   | 500       |                         | ND*                                      |

\*. Not determined

**Supplementary Table S3.** Composition of the mobile phase used for the fractionation of "Fraction B" by column chromatography and biological activity.

| Mobile phase               | Vol. (mL) | Fractions             | Inhibition of <i>Salmonella</i> motility |
|----------------------------|-----------|-----------------------|------------------------------------------|
| Hexane                     | 100       | 1-2                   | Negative                                 |
| Hexane-ethyl acetate 5:5   | 100       |                       |                                          |
| Hexane-ethyl acetate 1:9   | 100       | 3-5<br>("Fraction C") | Positive                                 |
| Ethyl acetate-methanol 8:2 | 100       |                       |                                          |
| Ethyl acetate-methanol 6:4 | 100       | 6-9                   | Negative                                 |
| Ethyl acetate-methanol 3:7 | 100       |                       |                                          |
| Ethyl acetate-methanol 2:8 | 100       |                       |                                          |
| Methanol                   | 300       | 10-15                 | Negative                                 |
